# Supplementary material for: Electrospun silk nanofiber loaded with Ag-doped TiO2with high-reactive facet as multifunctional air filter
Source: Royal Society of Chemistry journal article supplement (doi:10.1039/d3ra04621d), 2023-01-01
Supplement: d3ra04621d1.pdf [file d3ra04621d1.pdf]

## Supporting Information

### Electrospun Silk Nanofiber Loaded with Ag-doped TiO<sub>2</sub> with High-reactive Facet as Multifunctional Air Filter

Sompit Wanwong,<sup>a\*</sup> Weradesh Sangkhun,<sup>a</sup> Pimsumon Jiamboonsri<sup>b</sup> and Teera Butburee<sup>c</sup>

<sup>a</sup>*Materials Technology Program, School of Energy, Environment and Materials, King Mongkut's University of Technology Thonburi, 126 Pracha Uthit Road, Bang Mod,*

*Thung Khru, Bangkok 10140, Thailand.*

<sup>b</sup>*Faculty of Medicine, King Mongkut's Institute of Technology Ladkrabang, Bangkok 10520, Thailand.*

<sup>c</sup>*National Nanotechnology Center, National Science and Technology Development Agency, Thailand Science Park, Pathum Thani 12120, Thailand.*

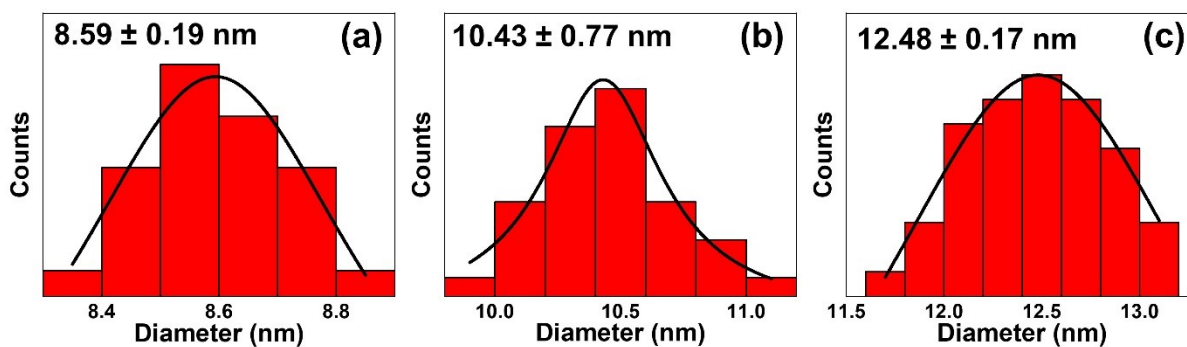

**Fig. S1** Particle size distribution of AgNPs (a) 0.1%Ag-TiO<sub>2</sub>, (b) 1%Ag-TiO<sub>2</sub>, and (c) 10% Ag-TiO<sub>2</sub>.

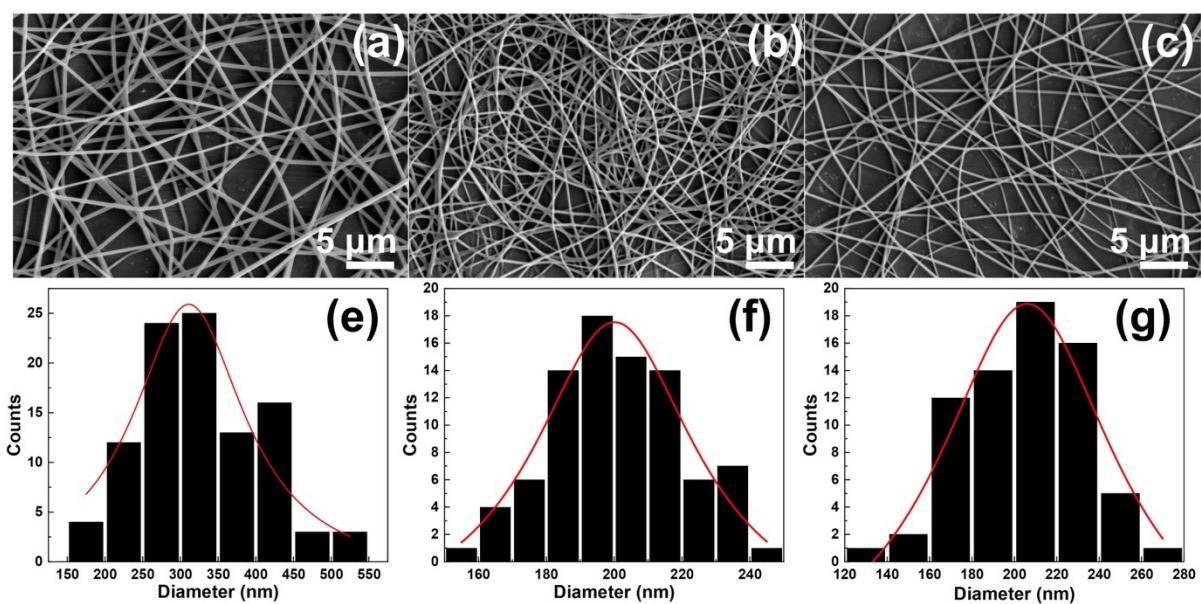

**Fig. S2.** SEM images of electrospun silk obtained from using applied voltage of (a) 12 kV, (b) 15 kV, and (c) 20 kV with injection flow rate of 0.6 mL/h.

**Table S1** Summary of average fiber diameter and coefficient of variation of electrospun silk

| Samples | Applied voltage (kV) | Average fiber diameter (nm) | Coefficient of variation (SD/FD) |
|---------|----------------------|-----------------------------|----------------------------------|
| Silk    | 12                   | $311.05 \pm 12.47$          | 0.040                            |
|         | 15                   | $200.14 \pm 1.73$           | 0.009                            |
|         | 20                   | $206.02 \pm 3.38$           | 0.016                            |

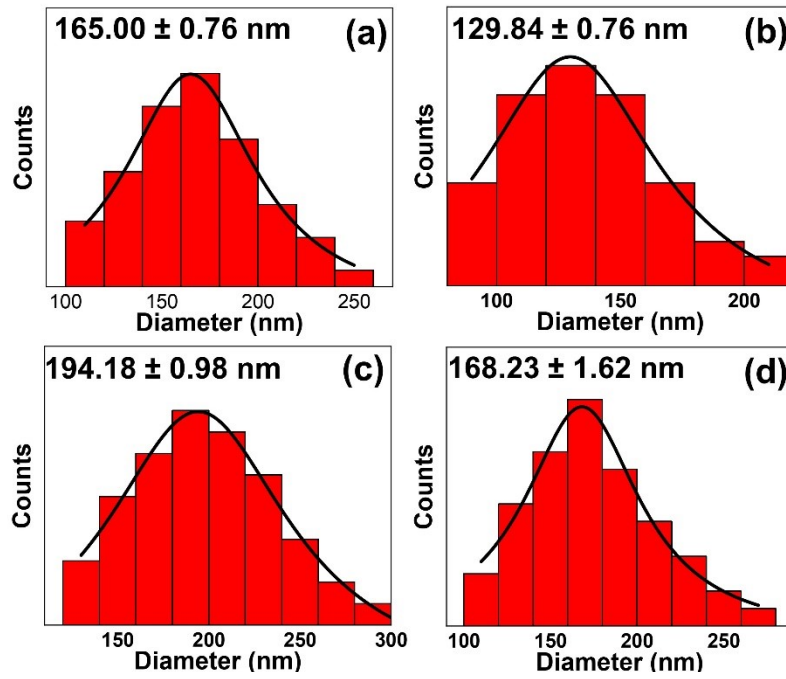

**Fig. S3.** Particle size distribution of fiber diameter (a)  $\text{TiO}_2$  (001), (b) 0.1%Ag- $\text{TiO}_2$ , (c) 1%Ag- $\text{TiO}_2$ , and (d) 10%Ag- $\text{TiO}_2$ .

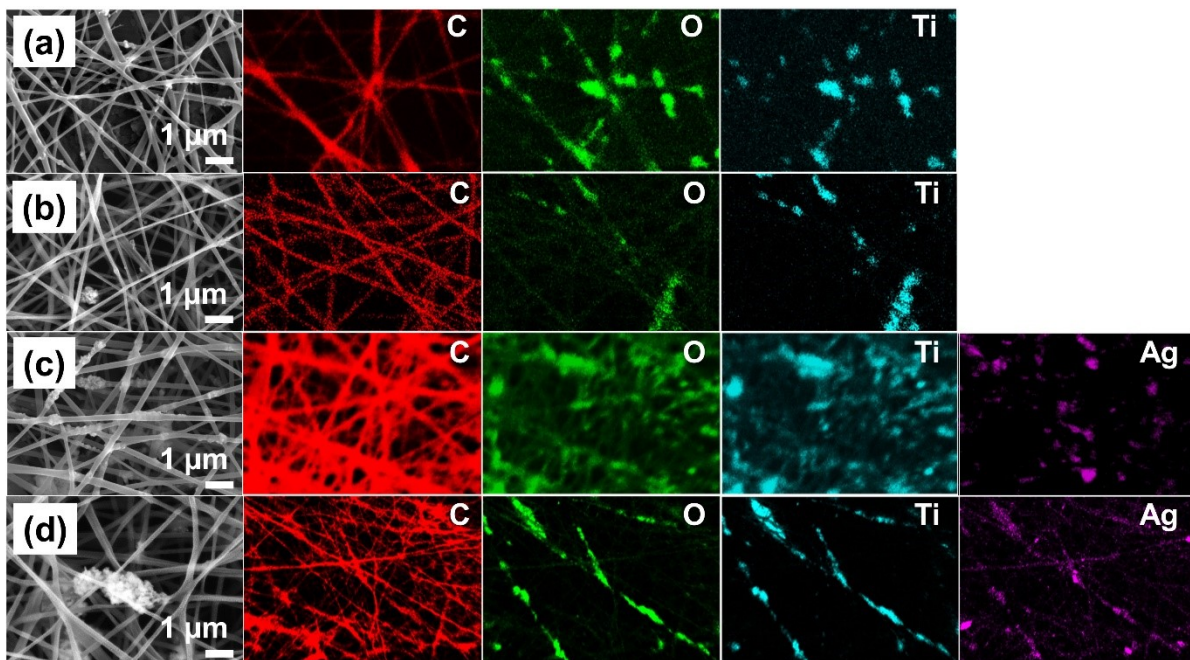

**Fig. S4** SEM and EDS mapping images of (a)  $\text{TiO}_2$ -silk, (b) 0.1%Ag- $\text{TiO}_2$ -silk, (c) 1%Ag- $\text{TiO}_2$ -silk and (d) 10%Ag- $\text{TiO}_2$ -silk.

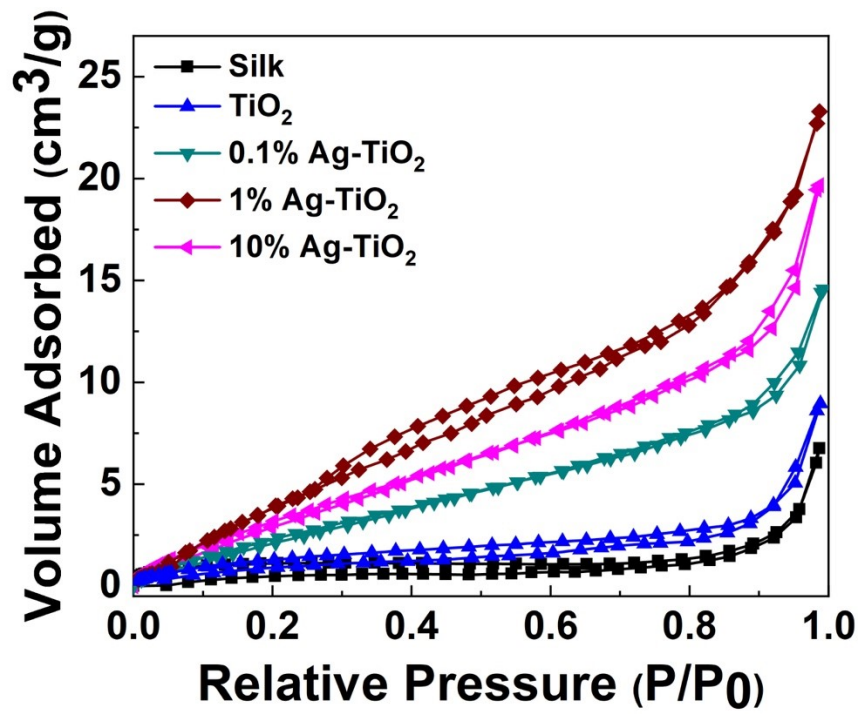

**Fig. S5** BET adsorption isotherm of electrospun silk, TiO<sub>2</sub>-silk, 0.1%Ag-TiO<sub>2</sub>-silk, 1%Ag-TiO<sub>2</sub>-silk, and 10%Ag-TiO<sub>2</sub>-silk nanofibers.

**Table S2.** Summary of PM<sub>2.5</sub> filtration efficiency, pressure drop and quality factor of silk, TiO<sub>2</sub>-silk and Ag-TiO<sub>2</sub>-silk nanofibers

| Samples                       | Filtration Efficiency (%) | Pressure drop (Pa) | Quality factor (Pa <sup>-1</sup> ) |
|-------------------------------|---------------------------|--------------------|------------------------------------|
| Silk                          | 77.59 ± 0.58              | 30.00 ± 3.61       | 0.050 ± 0.005                      |
| TiO <sub>2</sub> -silk        | 87.03 ± 1.10              | 31.67 ± 3.79       | 0.064 ± 0.007                      |
| 0.1%Ag-TiO <sub>2</sub> -silk | 89.92 ± 1.29              | 33.67 ± 2.31       | 0.068 ± 0.008                      |
| 1%Ag-TiO <sub>2</sub> -silk   | 99.04 ± 1.70              | 34.33 ± 1.15       | 0.135 ± 0.017                      |
| 10%Ag-TiO <sub>2</sub> -silk  | 92.53 ± 2.10              | 35.67 ± 5.51       | 0.073 ± 0.023                      |

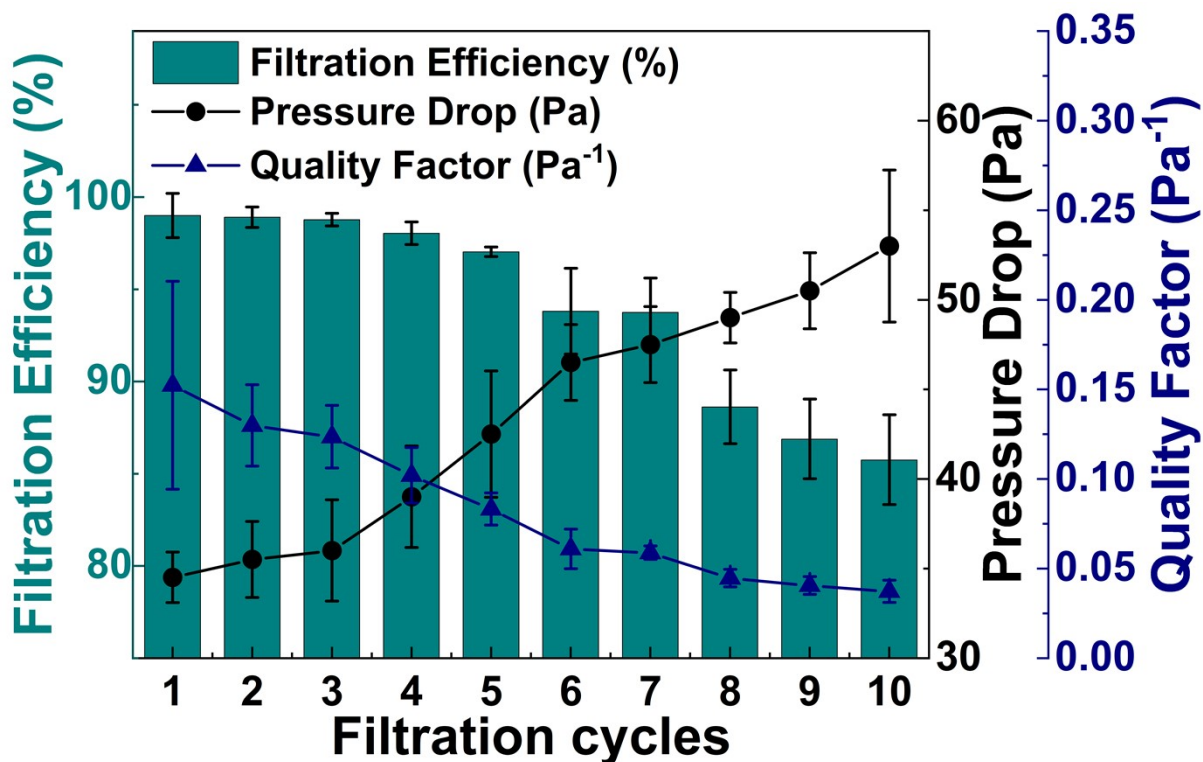

Fig. S6 PM<sub>2.5</sub> removal performance of 1%Ag-TiO<sub>2</sub> nanofiber from one to ten cycles.

Table S3. The apparent reaction rate constants (k) of photodegradation of formaldehyde

| Catalysts                     | Formaldehyde (k, min <sup>-1</sup> ) |
|-------------------------------|--------------------------------------|
| Control Exp.                  | $4.70 \times 10^{-5}$                |
| TiO <sub>2</sub>              | 0.07                                 |
| 0.1%Ag-TiO <sub>2</sub> -silk | 0.001                                |
| 1%Ag-TiO <sub>2</sub> -silk   | 0.034                                |
| 10%Ag-TiO <sub>2</sub> -silk  | 0.017                                |
